# Supplementary material for: Novel photodriven composite phase change materials with bioinspired modification of BN for solar-thermal energy conversion and storage
Source: Royal Society of Chemistry journal article supplement (doi:10.1039/c6ta03733j), 2016-01-01
Supplement: c6ta03733j1.pdf [file c6ta03733j1.pdf]

## Electronic Supplementary Information

### Novel Photodriven Composite Phase Change Materials with Bioinspired Modification of BN for Solar Thermal Energy Storage

Jie Yang, Guo-Qiang Qi, Li-Sheng Tang, Rui-Ying Bao, Lu Bai, Zheng-Ying Liu, Wei

Yang\*, Bang-Hu Xie, Ming-Bo Yang

College of Polymer Science and Engineering, Sichuan University, State Key Laboratory of

Polymer Materials Engineering, Chengdu 610065, Sichuan, China

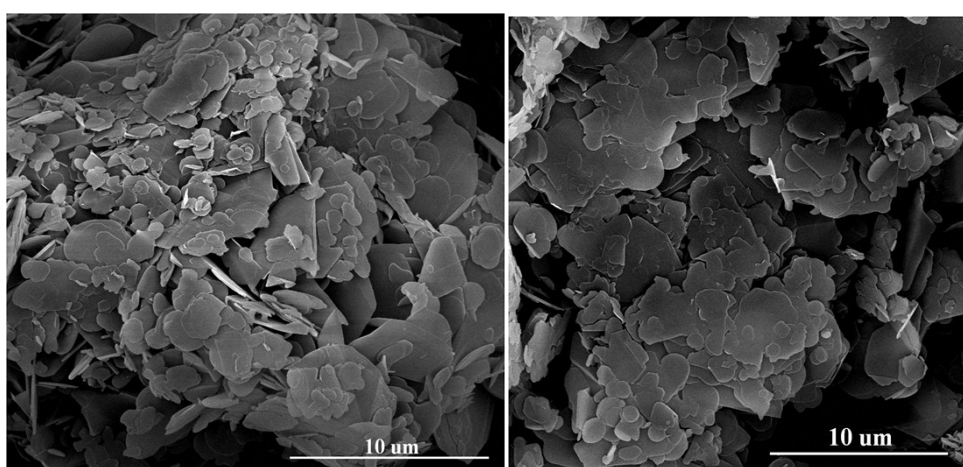

(a)

(b)

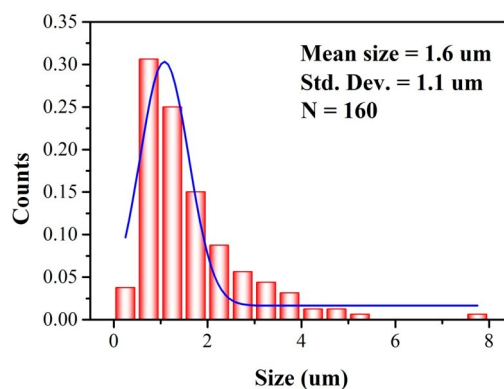

(c)

Fig. S1 (a)-(b) SEM image of pristine BN microplatelets and (c) lateral size distribution of the platelets. The average lateral size was  $1.6 \pm 1.1$   $\mu\text{m}$  by counting 160 flakes.

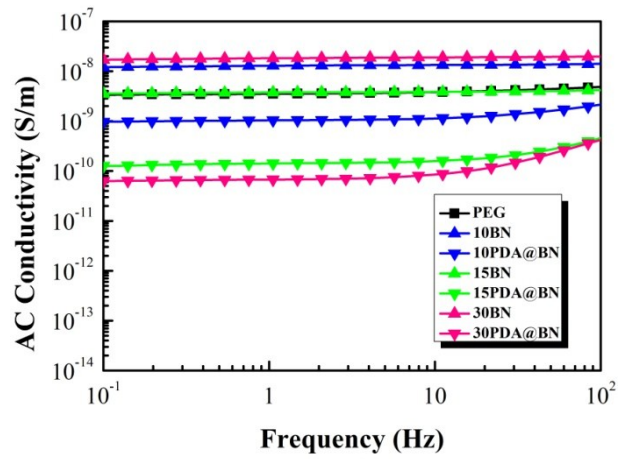

Fig. S2 The AC conductivity of the PEG and the composite PCMs.

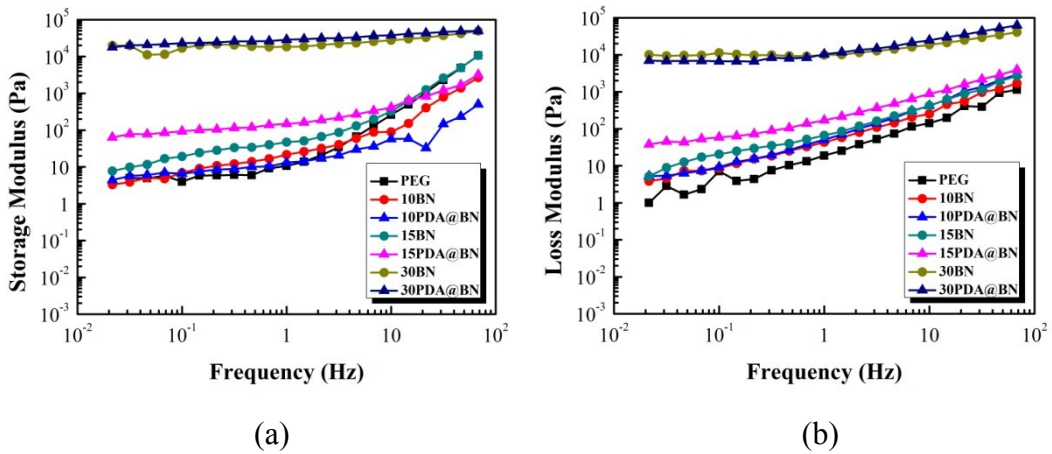

Fig. S3 Storage modulus (a) and loss modulus (b) plotted as a function of frequency for PEG, PEG/BN and PEG/PDA@BN composite PCMs.

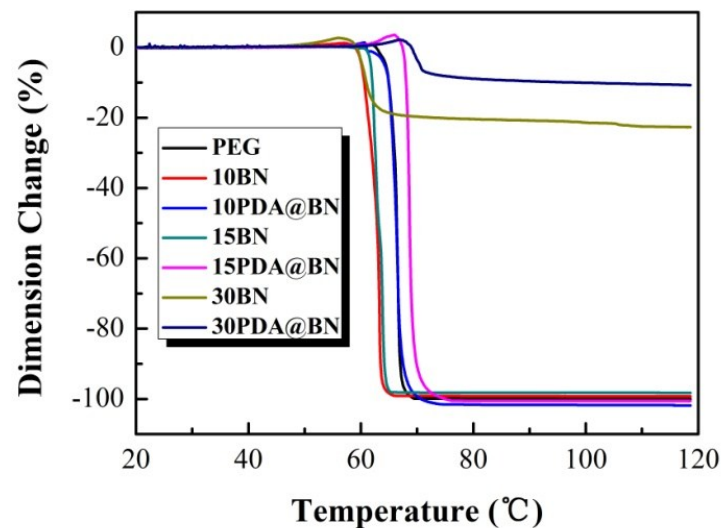

Fig. S4 TMA curves of PEG, PEG/BN and PEG/PDA@BN composite PCMs.

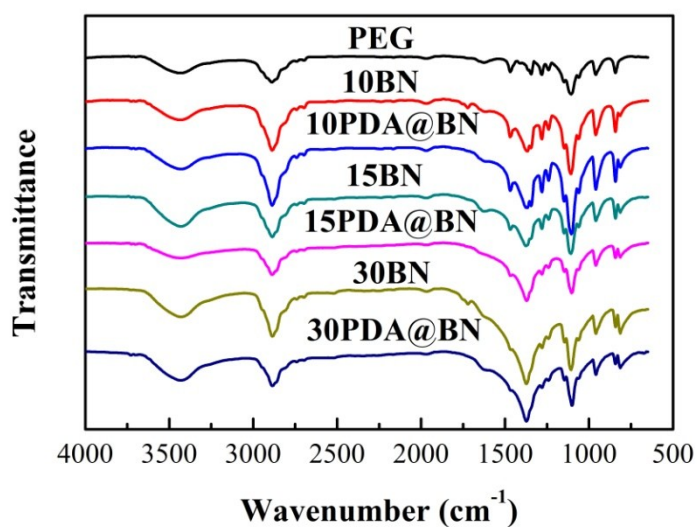

Fig. S5 FTIR spectrum of PEG, PEG/BN and PEG/PDA@BN composite PCMs.
